# Supplementary material for: The Effect of Phenolic-Rich Extracts of Rubus fruticosus, R. ulmifolius and Morus nigra on Oxidative Stress and Caco-2 Inhibition Growth
Source: MDPI journal article supplement (doi:10.3390/nu16091361), 2024-04-30
Supplement: s1 [file s1]

Supplementary Materials

# The Effect of Phenolic-Rich Extracts of *Rubus fruticosus*, *R. ulmifolius* and *Morus nigra* on Oxidative Stress and Caco-2 Inhibition Growth

Mariana S. Martins <sup>1</sup>, Márcio Rodrigues <sup>1,2</sup>, José David Flores-Félix <sup>1,3</sup>, Cristina Garcia-Viguera <sup>4</sup>, Diego A. Moreno <sup>4</sup>, Gilberto Alves <sup>1</sup>, Luís R. Silva <sup>1,5,6,\*</sup> and Ana C. Gonçalves <sup>1,7,\*</sup>

**Table S1.** Retention time (Rt), wavelengths of maximum absorption in the ultraviolet-visible region ( $\lambda_{\text{max}}$ ), mass spectral data and identification of anthocyanins and non-coloured phenolic compounds found in *R. fruticosus* and *R. ulmifolius* blackberries and *M. nigra* mulberry phenolic-rich extracts grown in Covilhã region, Portugal.

| Peak                   | Phenolic compounds                           | HPLC-DAD-ESI-MS <sup>n</sup> characteristics |               |                              |                                    |
|------------------------|----------------------------------------------|----------------------------------------------|---------------|------------------------------|------------------------------------|
|                        |                                              | Rt<br>(min)                                  | $\lambda$ max | Molecular ion [M+H]<br>(m/z) | Fragments MS <sup>n</sup><br>(m/z) |
| Anthocyanins           |                                              |                                              |               |                              |                                    |
| 1                      | Cyanidin 3- <i>O</i> -glucoside (1)          | 7.5                                          | 518           | 449                          | 287                                |
| 2                      | Cyanidin 3- <i>O</i> -glucoside (2)          | 9.4                                          | 518           | 449                          | 287                                |
| 3                      | Cyanidin 3- <i>O</i> -rutinoside             | 10.2                                         | 518           | 595                          | 449,287                            |
| 4                      | Pelargonidin glucoside                       | 11.5                                         | -             | 433                          | 287                                |
| 5                      | Cyanidin arabinose/xyloside                  | 13.2                                         | 518           | 419                          | 287                                |
| 6                      | Cyanidin-malonyl-glucoside                   | 14.5                                         | 518           | 535                          | 287                                |
| 7                      | Cyanidin-dioxalyl-glucoside                  | 15.8                                         | 516           | 593                          | 287                                |
| Non-coloured compounds |                                              |                                              |               |                              |                                    |
| 8                      | Ellagitannin (Pedunculagin I)                | 4.1                                          | 376           | 783                          | 481,301                            |
| 9                      | Elagitannin (Pedunculagin II)                | 5.2                                          | 374           | 783                          | 481,301                            |
| 10                     | 3-Caffeoyl-quinic acid (Neochlorogenic acid) | 7.3                                          | 329           | 353                          | 191,179                            |
| 11                     | 5- <i>p</i> -Coumaroyl quinic acid           | 11.2                                         | 320           | 337                          | 191                                |
| 12                     | Ellagic acid pentoside                       | 14.9                                         | 364           | 433                          | 301                                |
| 13                     | Galloyl-Hexahydroxydiphenoyl-glucoside       | 16.8                                         | 360           | 633                          | 301,275                            |
| 14                     | Quercetin 3- <i>O</i> -rutinoside            | 17.3                                         | 364           | 609                          | 301                                |
| 15                     | <b>Quercetin 3-<i>O</i>-glucuronide</b>      | <b>18.5</b>                                  | <b>354</b>    | <b>477</b>                   | <b>301</b>                         |
| 16                     | Quercetin 3- <i>O</i> -glucoside derivative  | 20.7                                         | 354           | 603, 463                     | 301                                |
| 17                     | Quercetin acetyl-glucoside                   | 20.8                                         | 354           | 505                          | 301                                |
| 18                     | Kaempferol 3-rutinoside                      | 20.9                                         | 346           | 593                          | 285                                |
| 19                     | Quercetin 3-pentoside                        | 21.3                                         | 356           | 433                          | 301                                |
